# Supplementary material for: Improving the reducibility of CeO2/TiO2 by high-temperature redox treatment: the key role of atomically thin CeO2 surface layers
Source: Royal Society of Chemistry journal article supplement (doi:10.1039/d1ta08348a), 2022-01-01
Supplement: d1ta08348a1.pdf [file d1ta08348a1.pdf]

Supporting information

**Improving the reducibility of  
CeO<sub>2</sub>/TiO<sub>2</sub> by high-temperature  
redox treatment: key role of  
atomically thin CeO<sub>2</sub> surface layers.**

Ramón Manzorro, José M. Montes-Monroy, D. Goma, José J. Calvino, José A. Pérez-Omil\*, Susana Trasobares.

Departamento de Ciencia de los Materiales e Ingeniería Metalúrgica y Química Inorgánica, Facultad de Ciencias,  
Universidad de Cádiz, Campus Río San Pedro, Puerto Real, 11510 Cádiz, Spain

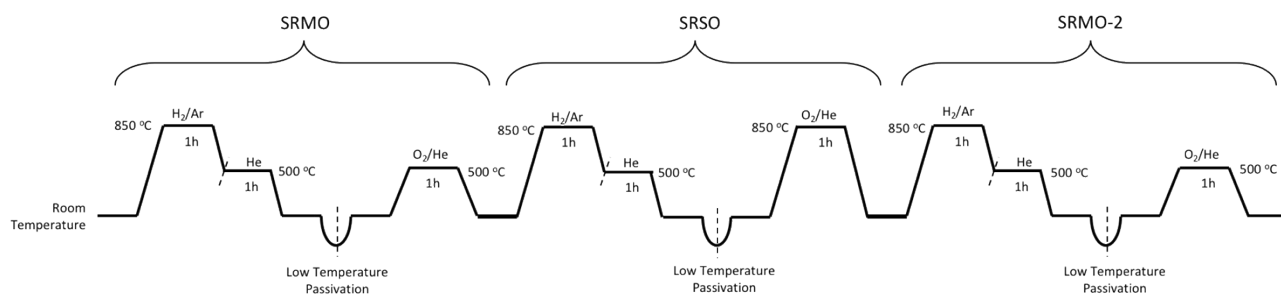

**Figure S1.** Scheme describing the procedure (gas environment and temperature) applied to the  $\text{CeO}_2/\text{TiO}_2$ -fresh sample. The first Severe-Reduction Mild-Oxidation (SRMO) gave rise to the  $\text{CeO}_2/\text{TiO}_2$ -SRMO-1C sample. Subsequent Severe-Reduction Severe Oxidation (SRSO) led to the formation of the  $\text{CeO}_2/\text{TiO}_2$ -SRSO-2C sample, and finally the posterior SRMO-2 treatment brought the  $\text{CeO}_2/\text{TiO}_2$ -SRMO-3C sample. All the severe treatments have been accomplished at 850 °C and mild treatments at 500 °C, in H<sub>2</sub>/Ar the case of reductions and O<sub>2</sub>/He for oxidations.

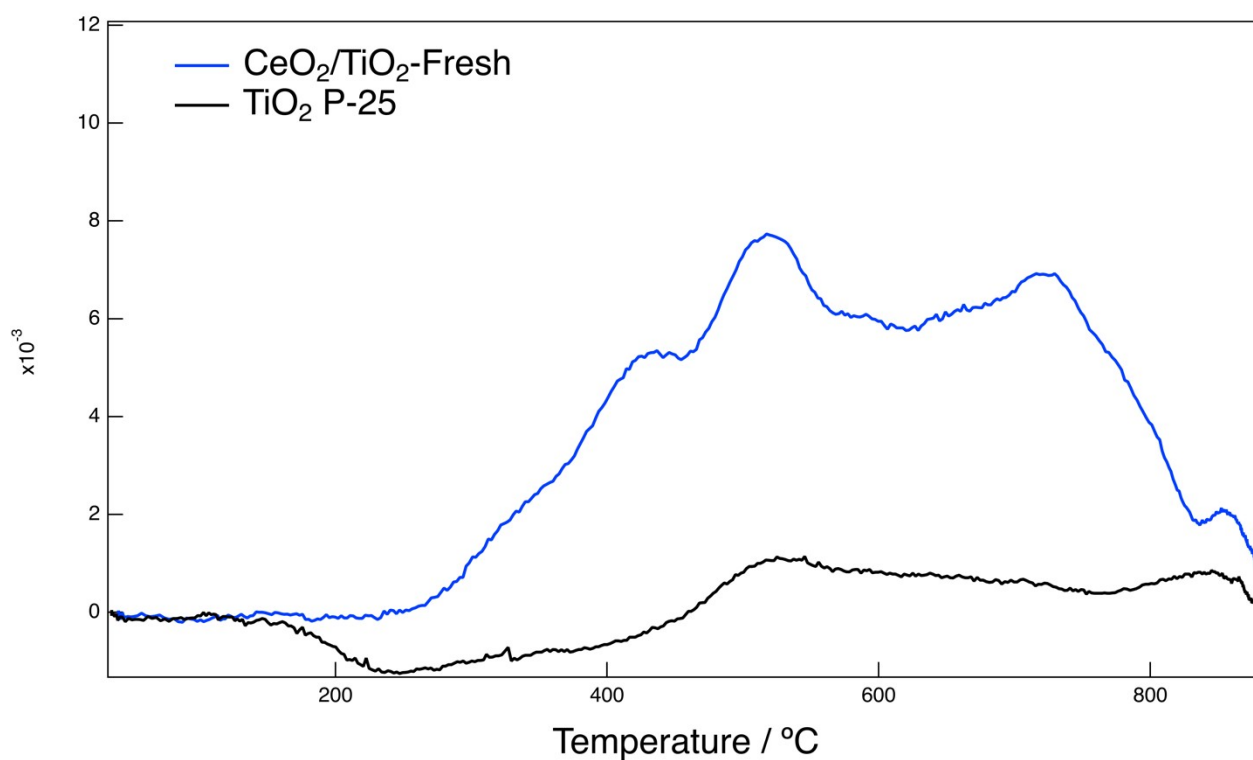

**Figure S2.** TPR-TCD profiles corresponding to the TiO<sub>2</sub>-P25 bare sample (black line), superimposed corresponding to the TPR-TCD of the CeO<sub>2</sub>/TiO<sub>2</sub>-fresh sample (blue line). Compared to the as-synthesized sample, the TiO<sub>2</sub> support shows a minor reduction degree, starting at ~500 °C with an almost constant low profile onwards.

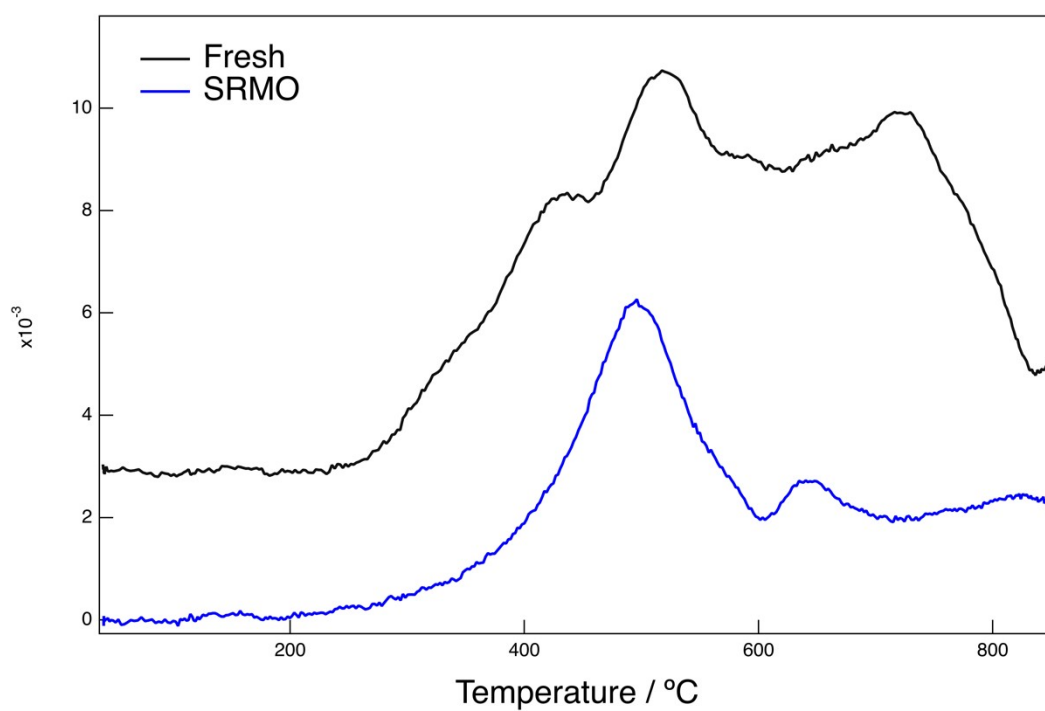

**Figure S3.** Quantitative TPR-TCD corresponding to the CeO<sub>2</sub>/TiO<sub>2</sub>-fresh (black line) and CeO<sub>2</sub>/TiO<sub>2</sub>-SRMO-1C (blue line). H<sub>2</sub> consumptions after considering the slight TiO<sub>2</sub> reduction, give rise to 0.29 and 0.16 mmol H<sub>2</sub>/g respectively.

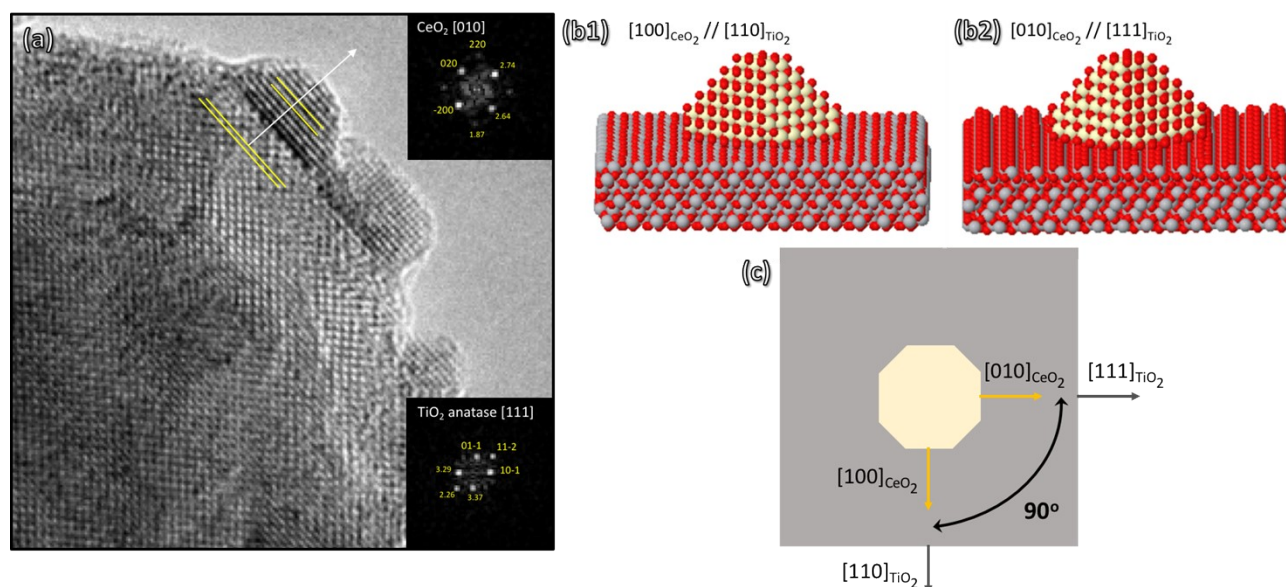

**Figure S4.** CeO<sub>2</sub>/TiO<sub>2</sub> structural relationship. (a) Experimental HRTEM image illustrating a couple of small CeO<sub>2</sub> nanoparticles deposited over a TiO<sub>2</sub> anatase particle where the white arrow shows the epitaxial growth of the planes indicated with yellow lines, (200) for CeO<sub>2</sub> along [010] and (11 $\bar{2}$ ) for TiO<sub>2</sub> along [111]. (b) CeO<sub>2</sub>/TiO<sub>2</sub> atomic models describing the structural relationship: (b1) represent the epitaxy reported in the bibliography taking place from the along the [100] and [110] zone axis in CeO<sub>2</sub> and TiO<sub>2</sub> respectively, meanwhile (b2) depicts the same structural relationship from directions [010] in CeO<sub>2</sub> and [111] in TiO<sub>2</sub>, characterized in our present work. (c) Scheme revealing the 90° relationship between the two situations described in atomic models.

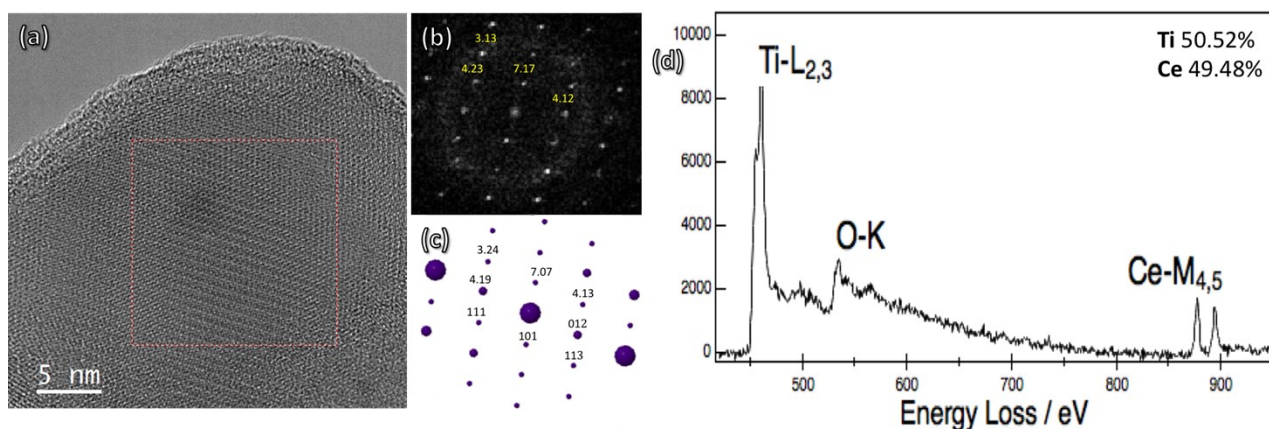

**Figure S5.**  $\text{Ce}_2\text{Ti}_2\text{O}_7$  structure. (a) HREM image corresponding to a  $\text{Ce}_2\text{Ti}_2\text{O}_7$  perovskite oriented in the [121] direction. (b) Digital diffraction pattern extracted from the region marked with a dotted box on the  $\text{Ce}_2\text{Ti}_2\text{O}_7$  crystal. (c) Theoretical diffraction pattern for this structure on the [121] direction, showing same reflections that the ones observed on the experimental one, confirming the structure and the zone axis. (d) EELS spectrum acquired over the crystal under study. Quantification through Ti-L<sub>2,3</sub> and Ce-M<sub>4,5</sub> edges points out a 1:1 proportion on the Ce:Ti ratio, as expected for the structure  $\text{Ce}_2\text{Ti}_2\text{O}_7$ .

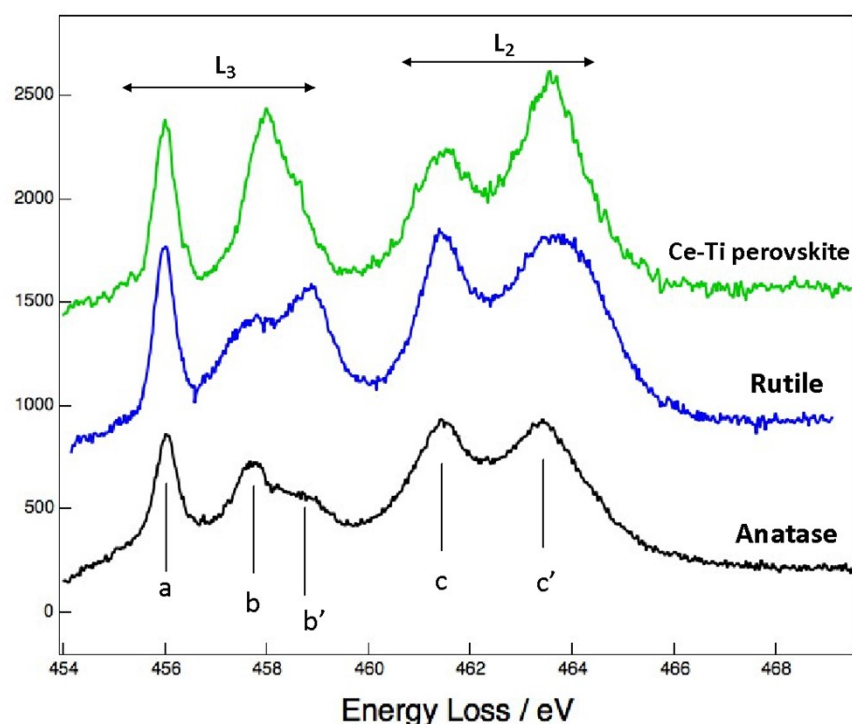

**Figure S6.** Analysis of the ELNES structure. The graph gathers from bottom to top the Ti-L<sub>2,3</sub> edge of anatase, rutile and Ce-Ti bulk-type mixed oxide phases. As compared to the well-reported anatase and rutile structure, the mixed oxide spectrum does not present a splitting in the  $e_g$  series of the L<sub>3</sub> edge, but a single and intense peak instead.

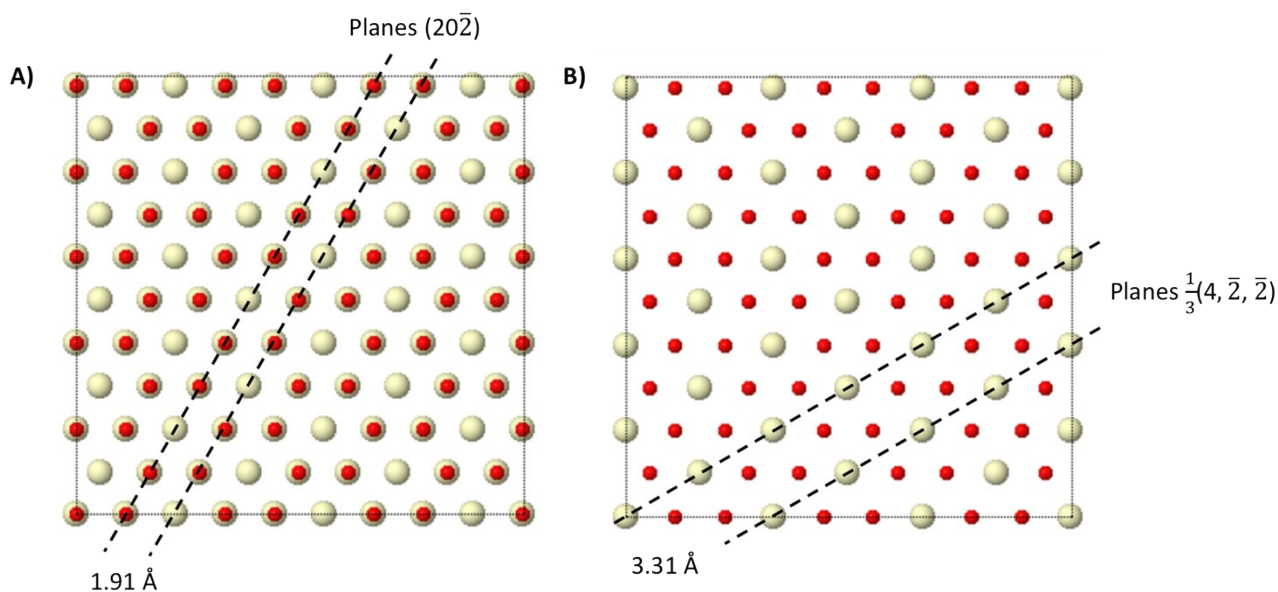

**Figure S7.** Atomic models corresponding to (111)-CeO<sub>2</sub> planes. (a) Top view of 3 (111)-CeO<sub>2</sub> facets stacks in a conventional ABC arrangement for fluorite. As indicated, the planes (20 $\bar{2}$ ) are separated by 1.91 Å. (b) In contrast, the planes taking place, and therefore, the spacings, in a single (111)-CeO<sub>2</sub> facet are different compared to the ABC stacked structure. For a single (111) layer, the planes observed are  $\frac{1}{3}(4\bar{2}\bar{2})$ , with larger spacings, 3.31 Å, equivalent to the (100) reflection for the trigonal A-Ce<sub>2</sub>O<sub>3</sub> structure. These atomic models consider the 5.41 Å characteristic lattice parameter for CeO<sub>2</sub> bulk.

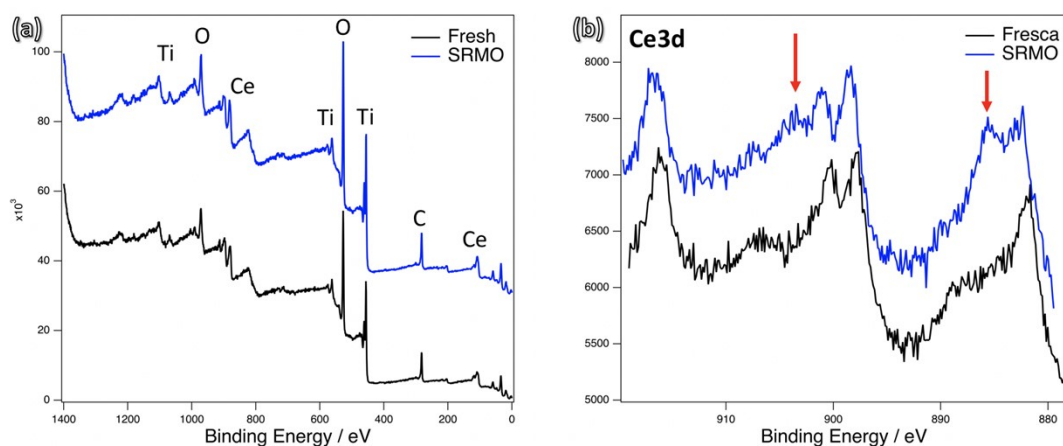

(c) XPS results for  $\text{CeO}_2/\text{TiO}_2$ -fresh and  $\text{CeO}_2/\text{TiO}_2$ -SRMO-1C samples

|       | Ce/Ti | $\text{Ce}^{3+}/\text{Ce}^{4+}$ (short) | $\text{Ce}^{3+}/\text{Ce}^{4+}$ |
|-------|-------|-----------------------------------------|---------------------------------|
| Fresh | 0.202 | 0.20                                    | 0.61                            |
| SRMO  | 0.195 | 0.41                                    | 1.53                            |

(d) Angle-resolved XPS performed on the  $\text{CeO}_2/\text{TiO}_2$ -SRMO-1C samples

| Angle | 75   | 60   | 45   | 30   | 15   |
|-------|------|------|------|------|------|
| Ce/Ti | 0.18 | 0.18 | 0.18 | 0.19 | 0.20 |

**Figure S8.** Summary of the XPS analysis carried out on the  $\text{CeO}_2/\text{TiO}_2$ -fresh and  $\text{CeO}_2/\text{TiO}_2$ -SRMO-1C. (a) Survey (0-1400 eV) XPS spectra of the fresh (black line) and SRMO (blue line) samples, where the main peaks corresponding to Ce, Ti, O and C have been labelled. (b) High-resolution spectra of Ce-3d. Red arrows indicate the main contribution of  $\text{Ce}^{3+}$ , much more evident for the SRMO sample. (c) Ce/Ti and  $\text{Ce}^{3+}/\text{Ce}^{4+}$  molar ratios quantified from XPS spectra. (d) Angle-resolved Ce/Ti molar ratio obtained for different incident angles.

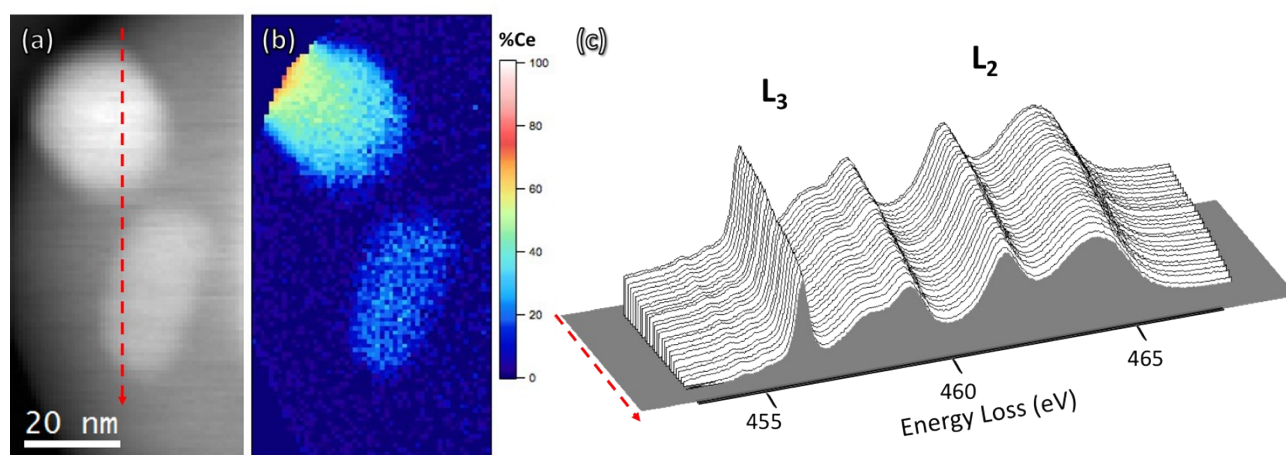

**Figure S9.** Analysis of the ELNES structure for the CeO<sub>2</sub>/TiO<sub>2</sub>-SRSO-2C sample. (a) Representative ADF image illustrating two bright regions with a high content of Ce, as observed in the elemental map (b) built with the Ce-M<sub>4,5</sub> edge. (c) Ti-L<sub>2,3</sub> fine structure registered across the red arrow on the ADF image. The ELNES analysis points out that, even though the content of cerium is high, the Ti-L<sub>2,3</sub> structure remains on its rutile phase. This fact suggests the cerium and titanium are not forming a mixed oxide but instead ceria particles supported on rutile-like titania crystals.

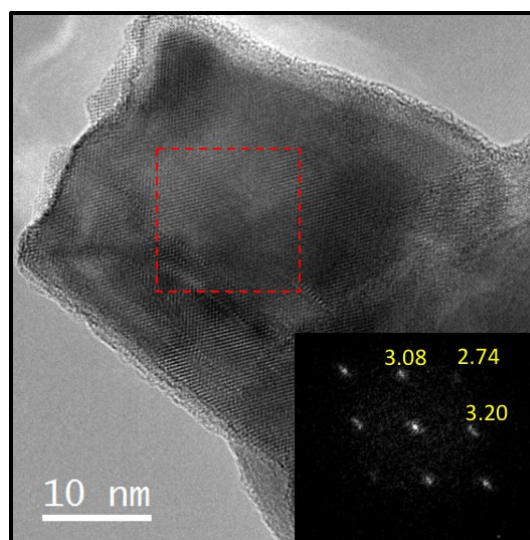

**Figure S10.** Fluorite-type  $\text{CeO}_2$  crystal corresponding to the  $\text{CeO}_2/\text{TiO}_2$ -SRSO-2C sample. The digital diffraction pattern acquired on the red box presented as an inset on the image, indicates that the particle is oriented along the  $[011]$  zone axis.
